# Supplementary material for: Assessing the tropical Atlantic biogeochemical processes in the Norwegian Earth System Model
Source: Copernicus journal article supplement (doi:10.5194/egusphere-2023-2947), 2023-12-20
Supplement: Supplementary file 1 [file egusphere-2023-2947-supplement.pdf]

## Supplementary Information of Koseki et al.

Here, we would like to have supplementary figures for Koseki et al. This information consists of 5 figures.

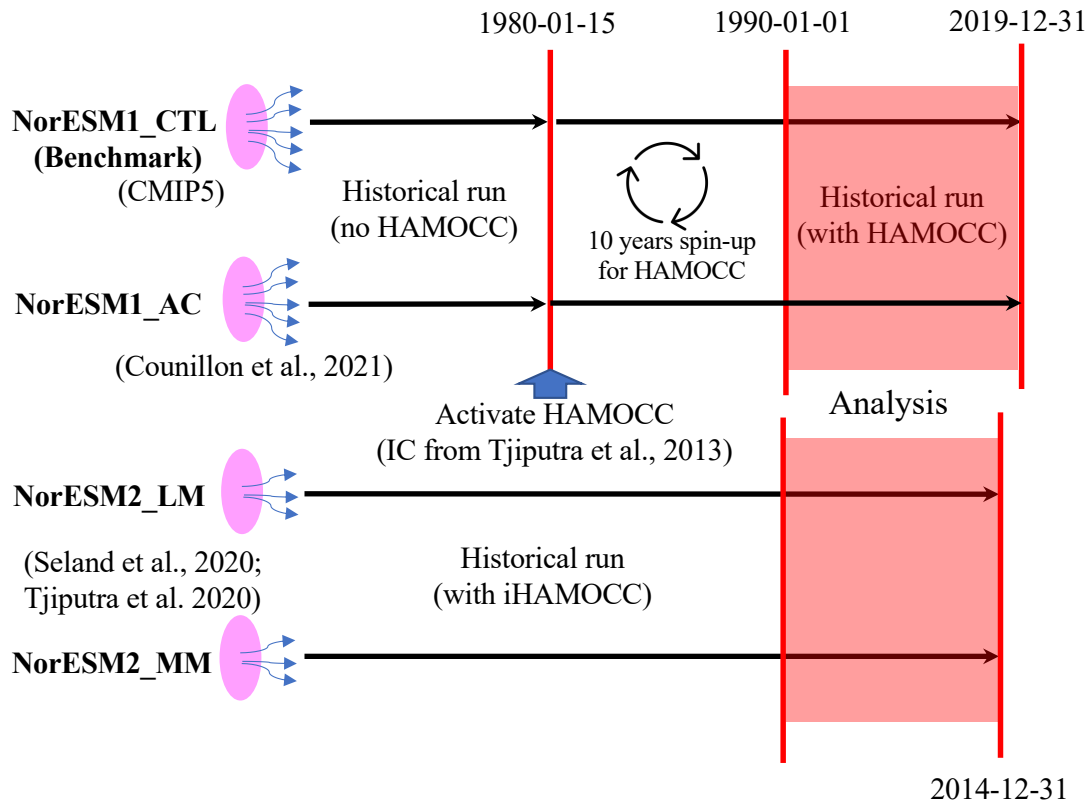

**Figure S1.** Schematic of experimental designs of NorESMs

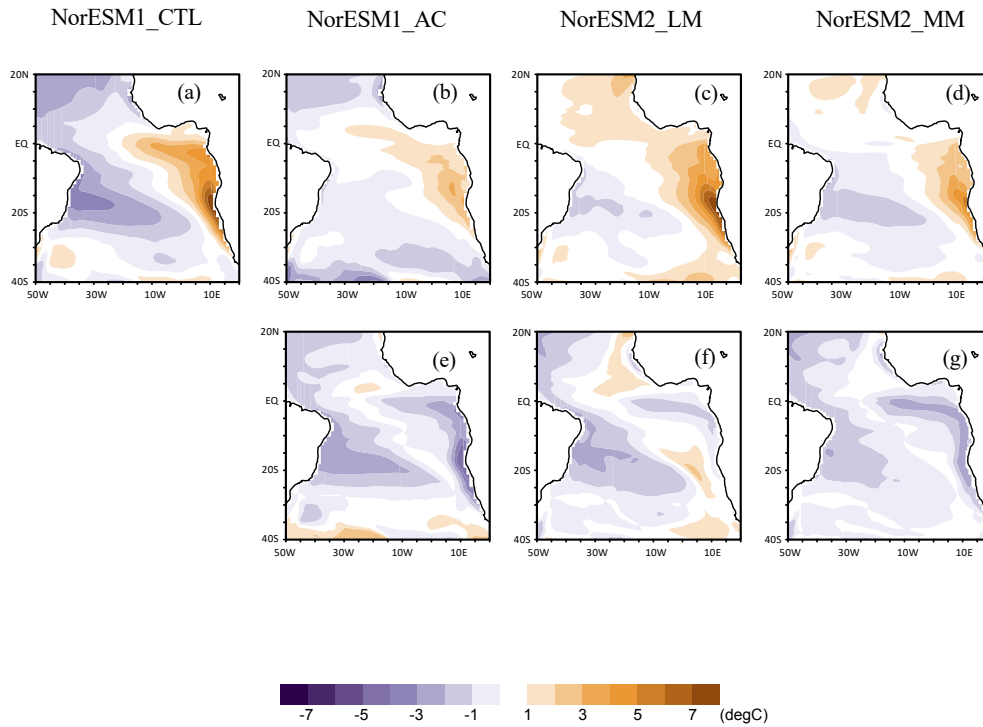

**Figure S2**  
Same as Fig. 1, but for summer (June-July-August) climatology

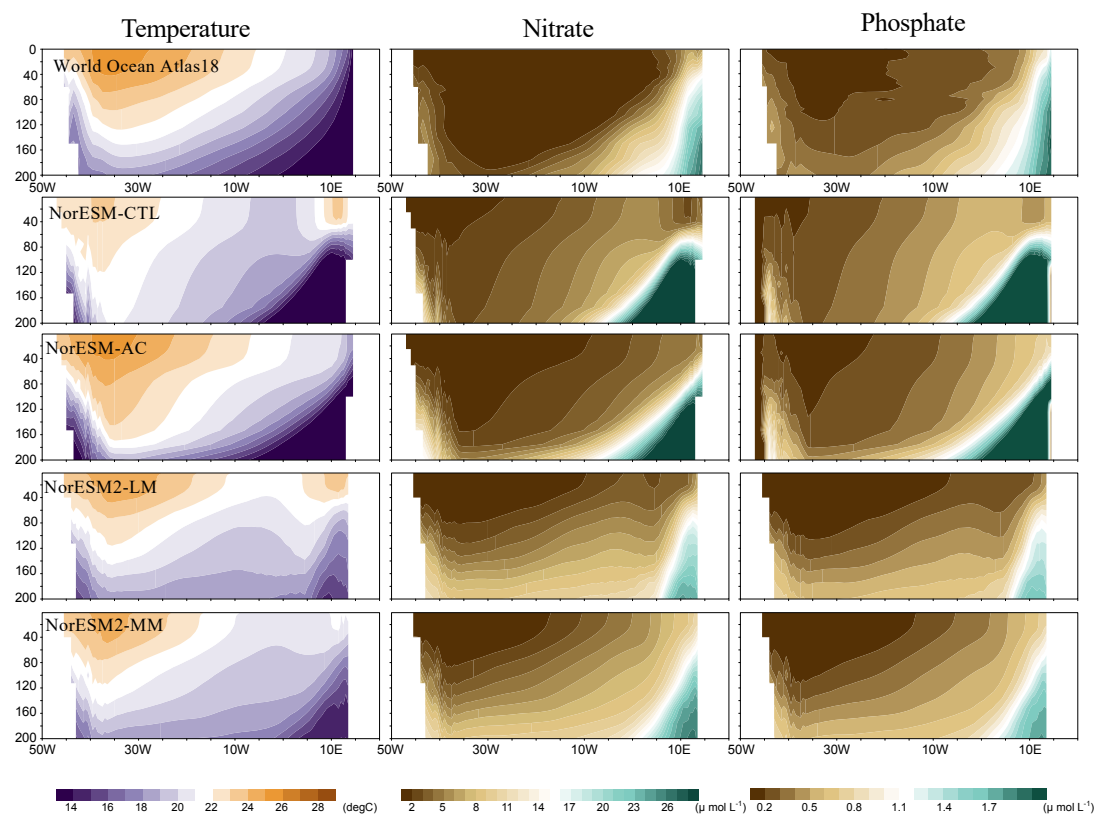

**Figure S3**  
Depth-longitude section of annual-mean climatology for (left) temperature, (middle) nitrate, and (right) phosphate averaged 25°S and 18°S in observations and each NorESM simulation.

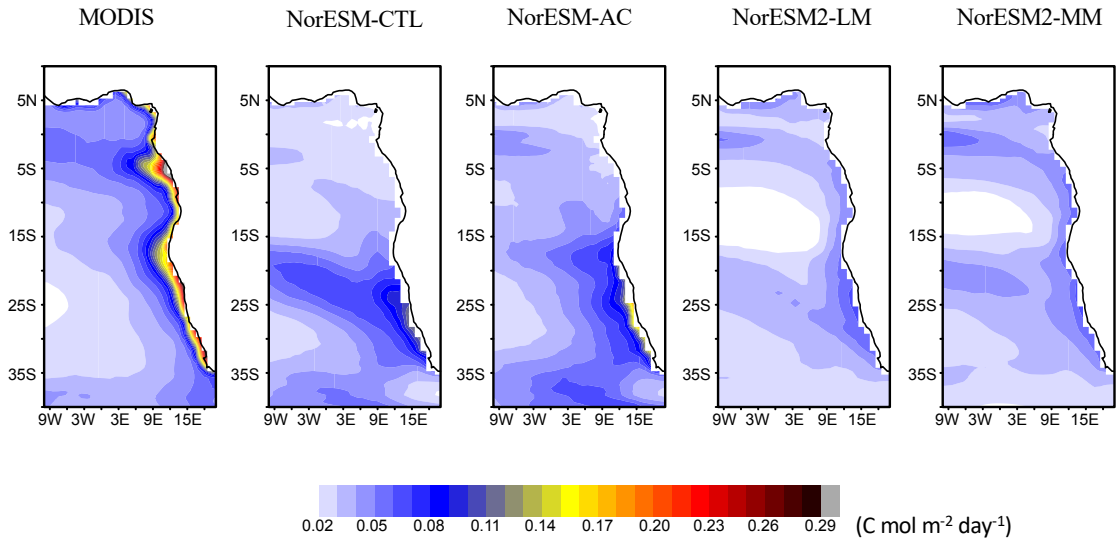

**Figure S4**  
Annual-mean climatology for primary production in observations and each NorESM simulation.

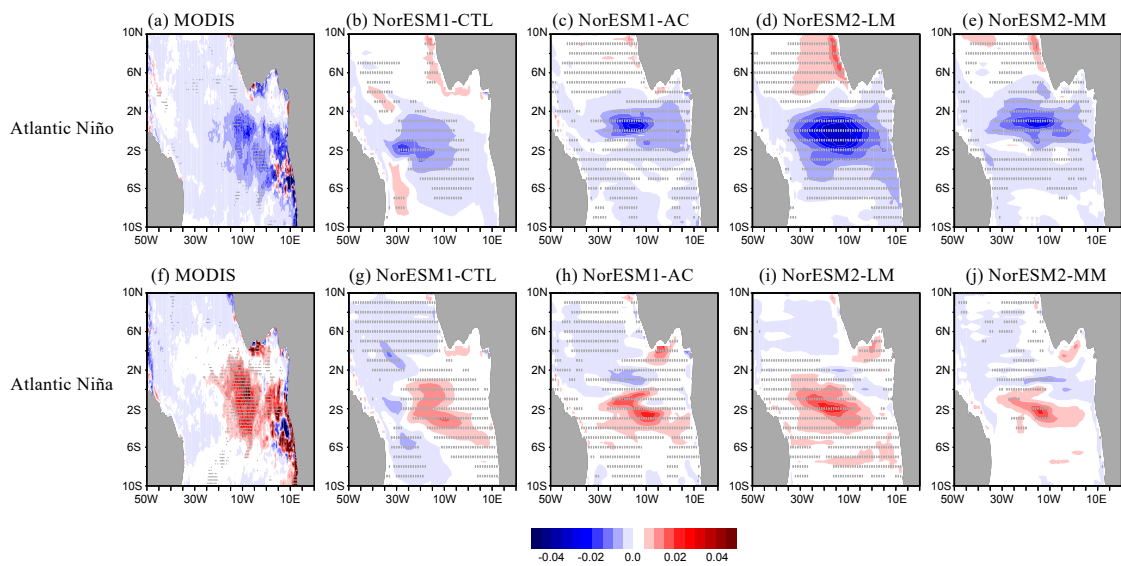

**Figure S5**  
Composite anomalies of primary production for observation and NorESM simulation for (top) Atlantic Niño and (bottom) Atlantic Niña in June-July, respectively.
