# Supplementary material for: Assessing the tropical Atlantic biogeochemical processes in the Norwegian Earth System Model
Source: Copernicus journal article supplement (doi:10.5194/egusphere-2023-2947), 2023-12-20
Supplement: Supplementary file [file egusphere-2023-2947-AC2-supplement.pdf]

## Reply to Reviewer #2

This study analyses the skills of the ESM NorESM at reproducing the physical and biogeochemical characteristics of the tropical Atlantic Ocean. A set of 4 model configurations is compared: the NORESM1 configuration, the NORESM1 configuration with flux correction based on observations, and two configurations based on NORESM2 (coarse and medium spatial resolution of the atmospheric component). The standard NORESM1 setup exhibits strong biases both on ocean dynamics and biogeochemistry which are improved with flux correction or a higher resolution of the atmospheric configuration. The low resolution version of NORESM1 also shows some improvements which suggests that the new parameterizations and calibration in the version 2 also contribute to the improved skills. Another important conclusion of the study is that biases in the simulated ocean dynamics have a strong imprint on the simulated ocean biogeochemistry (nutrients, NPP and pCO<sub>2</sub>). And this concerns the mean state, the seasonality and interannual variability.

**REPLY:** We gratefully appreciate the reviewer for reviewing our manuscript very carefully and providing constructive comments. Here, we reply to the comments point-by-point and will upload the revised manuscript following these comments. Please note that any revisions in the manuscript will be given in **blue-color font** for easy-tracking.

I have several general concerns:

1) The description of the different model configurations and the main differences between them is rather short and is thus very difficult to follow for someone who is not an expert of NorESM. I think that some additional information is necessary such as more details on the flux correction technique, on the main differences between the different model components that are relevant for the study.

**REPLY:** Thank you very much for this comment. We added some texts on anomaly coupling method and made a table of four configurations of NorESM we used in this study as shown below. This table will be added as Table R1 and give some description in the **Section 2.2: Model configurations**. Please see lines at 120-122 and 136-137.

|             | Atmosphere    | Ocean           | Bias Correction                                                      | New Parameterization / Updates | Ensemble Number | Historical Period |
|-------------|---------------|-----------------|----------------------------------------------------------------------|--------------------------------|-----------------|-------------------|
| NorESM1-CTL | CAM4 (143x96) | MICOM (319x384) | No                                                                   | No                             | 5               | 1990-2019         |
| NorESM1-AC  | CAM4 (143x96) | MICOM (319x384) | Anomaly Coupling (Toniazzo and Koseki, 2018; Counillon et al., 2021) | No                             | 5               | 1990-2019         |

|            |                   |                   |    |                                                                                                                                                                                                            |   |               |
|------------|-------------------|-------------------|----|------------------------------------------------------------------------------------------------------------------------------------------------------------------------------------------------------------|---|---------------|
| NorESM2-LM | CAM5<br>(143x96)  | BLOM<br>(319x384) | No | Ocean mixig layer<br>(Ilicak et al., 2009)<br><br>Ocean eddy diffusion<br>(Eden et al.,2009)<br><br>Atmospheric angular<br>momemtum<br>(Toniazzo et al.,2020)<br><br>More details, Seland<br>et al. (2020) | 3 | 1990-<br>2014 |
| NorESM2-MM | CAM5<br>(287x192) | BLOM<br>(319x384) | No | Ocean mixig layer<br>(Ilicak et al., 2009)<br><br>Ocean eddy diffusion<br>(Eden et al.,2009)<br><br>Atmospheric angular<br>momemtum<br>(Toniazzo et al.,2020)<br><br>More details, Seland<br>et al. (2020) | 3 | 1990-<br>2014 |

**Table R1.** List of the atmospheric and oceanic components and their spatial horizontal resolution for the four different NorESM configurations. Information on bias correction, parameterization/updates of each component, ensemble number, and the historical period analyzed in this study are also provided.

2) The different configurations are quite well designed to illustrate the improvements to be expected, at least from a better representation of the atmospheric state (flux correction, higher spatial resolution). However, I find that the attribution and the mechanistic understanding are rather too vague. For sure, some changes in the model components explain part of the improvement since NorESM2-LM performs better than NorESM1-CTL, but there is no discussion on these changes and what role they play in the improvement. For instance, what is explained by changes in the atmospheric, oceanic and biogeochemical components respectively? This would probably require additional experiments such as a NorESM2-AC. We also see that the upper thermocline is much more stratified in NorESM1 than in NorESM2: why and what are the consequences? Winds and evaporation minus precipitation are the main players but we have no idea of the biases they exhibit in the non corrected model configurations. A consequence of this general concern is the discussion that is really vague and not very informative, to my opinion.

**REPLY:** Thank you very much for raising this important point. Regarding a new experiment like **NorESM2-AC**, we agree that it is worth of performing bias-corrected simulations with NorESM2. On the other hand, as our results show (Figs. 1 and 2), NorESM2 simulations are successful to reduce the tropical Atlantic biases, which is more or less comprable with NorESM1-AC and our study is a first one to investigate and assess NorESM2 in the tropical Atlantic biogeochemical processes. Therefore, we intended to focus on NorESM2 without any corrections. In order to bias correct

NorESM2, we would need more computational time and other resources, due to the more complex components, to implement the method of anomaly coupling (Toniazzo and Koseki, 2018): modifications of model's source codes, spin-up with anomaly coupling, etc. Therefore, we consider that bias -correction of NorESM2 will be more suitable for future works. We will add this discussion in the **Summary and Discussion**.

However, we agree with the reviewer that more clarification on why NorESM2 simulations can reduce the bias of the tropical Atlantic are warranted. As we described in the Section2, there are simultaneous updates of physical and biogeochemical parameterizations included in NorESM2 from NorESM1, in addition to updated atmospheric and land components. Therefore, it is not feasible to isolate which new parameterization or process improvement is responsible for the improvements in the ocean biogeochemistry. Therefore, as a first order, we examined the vertical structure of ocean temperature as in Fig.2. The vertical structure is fundamental to investigate the model bias in the tropical Atlantic and NorESM2 experiments have better zonal gradient of the thermocline. This is an indication that ocean physical processes such as upwelling and Kelvin wave propagation (responsible for the thermocline gradient) are improved in the NorESM2. To make this implication more robust, we compare the seasonal cycle of sea surface height (SSH) among the observation and NorESM simulations as shown below in Fig.R1.

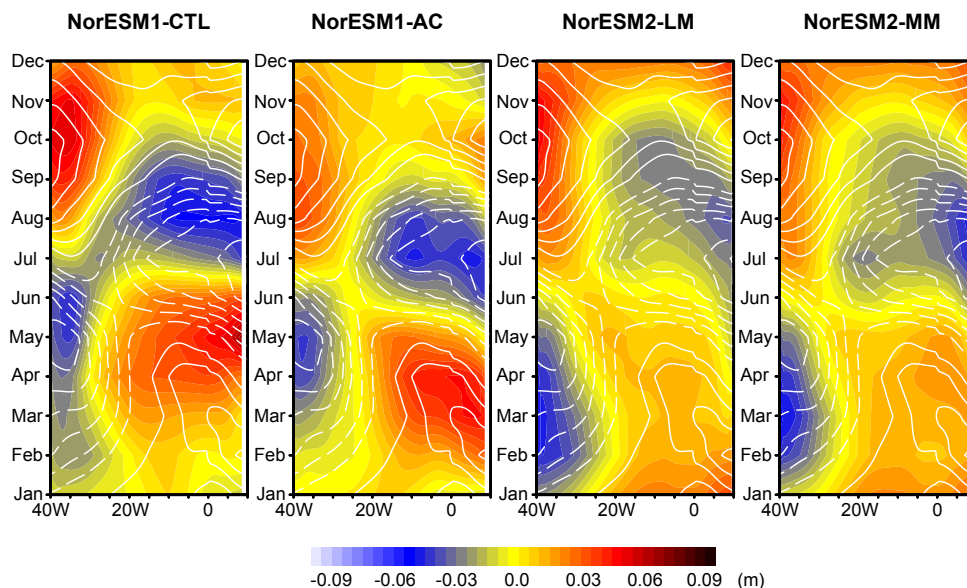

**Figure R1.** Hovmöller plot of sea surface height anomaly from annual mean (averaged between 3S-3N). The contour is for AVISO observation (contour interval is 0.01m, 1993-2001) and color shading are from different NorESM simulations.

In NorESM1-CTL, the seasonal cycle of high and low SSH in the eastern basin (20W-10E) is delayed by 1-2 months as compared to the observation. This is a common bias of ESMs generating a warm bias and a misrepresentation of the Atlantic Cold Tongue.

Especially, the low SSH is a result of eastward propagation of upwelling Kelvin wave from spring to summer. The westerly trade wind is a key driver of the upwelling Kelvin wave.

In NorESM1-AC, the climatological bias correction leads to considerable improvements of the SSH seasonal cycle. Applying this methodology of bias correction, the ocean component is forced by the right surface wind and this indicates that the upwelling Kelvin wave is also realistically generated. This appears to be the primary reason for the improved marine biogeochemical processes in NorESM1-AC.

In NorESM2, the seasonal cycle of SSH remains biased (in particular, NorESM2-LM), however, the shoaling of SSH is more realistic than NorESM1-CTL, for example, the shallowest longitude is 10E (as the observation) in NorESM2 and 10W-0 in NorESM1-CTL. This indicates that the upwelling Kelvin wave propagation is represented better in NorESM2 than in NorESM1-CTL. Actually, the dynamics among surface wind, Kelvin wave, SSH, and SST is maintained by the Bjerknes Feedback and it is hard to quantify which components play a more important role in alleviating the bias. However, we can indicate that NorESM2 reproduce more realistic air-sea interaction than NorESM1-CTL as shown in Figs. 2 and R1 and consequently, the marine biogeochemical processes are also improved as shown in Fig.5. We have added this statement and Fig.R1 as new Fig.S3. Please see lines at 198-204.

Regarding the stratification, one of possible causes might be different ocean mixing layer parameterization between NorESM1 and NorESM2. Other possibility is ocean circulation at deeper layer. As Figs. 2 and 5 show, NorESM1 has much cooler subsurface ocean and more nutrients. This indicates that upwelling of deeper ocean watermass is stronger in NorESM1. We also note that there might be other drivers for this difference, for example, the stronger AMOC in NorESM1. We already discussed this point at lines 278-280 in the original manuscript.

**3) Marine biogeochemistry is evaluated by inspecting nutrients, PP and pCO<sub>2</sub>. pCO<sub>2</sub> is very sensitive to the dynamics (as mentioned and shown in the study) and it is thus not very surprising that any improvement in the representation of ocean dynamics has a strong impact on it. It is not a very good tracer of the ecosystem component of the biogeochemical model. PP is not observed but reconstructed from some algorithms both for chlorophyll and PP itself which are known to have significant issues (different algorithms can give very different results). I would have liked to see a comparison to chlorophyll satellite data which are much more direct and with less uncertainties.**

**REPLY:** Thank you very much for raising this important point out. Yes, Chlorophyll should be an interesting variable to investigate. However, the biogeochemical component of our models is relatively simple and then, there is no output of chlorophyll. Primary production we analyzed here is a diagnostic variable of NorESM based on concentration of Phytoplankton (there is no trophic level), which is a

prognostic variable. In the revised manuscript, we will add the analysis of Chlorophyll calibrated by NorESM Phytoplankton and Level-4 observed chlorophyll data.

**In summary, I think that this study needs some major revisions addressing my general concerns before it can deserve publication. A crucial point is a more thorough investigation of the features that explain the improvements obtained in the different model configurations. Finally, the model performs quite bad in terms of PP and pCO<sub>2</sub>, even in the best configurations despite what the authors state sometimes in the study. However, this is not a concern for me because ESM but also quite coarse ocean-only models tend to behave quite badly in this basin. However, I would be curious to see Chlorophyll.**

**REPLY:** Thank you very much for your constructive comment. As we answered to the previous comment, our model does not have Chlorophyll as outputs and then, primary production might be a good comparison with the observation as a first choice.

**Minor comments:**

**on the manuscript as a whole: Obviously I'm not a native English speaker, but I think the English can be improved. In addition, there are typos and formatting problems with references throughout the manuscript that should be corrected.**

**REPLY:** Thank you very much for the comment. We have read the manuscript again more carefully and corrected the grammar and typos.

**Section 2.3: You don't explain what MPI SOM-FEM is.**

**REPLY:** Thank you very much for the comment. We have added it.

**Line 176: NorESM2 has a warmer subsurface and a less stratified upper thermocline (seen also on the nutrient vertical distribution), why? It relates to my general concern 2.**

**REPLY:** As we answered to the previous comment, this might be because of the difference in the AMOC between NorESM1 and NorESM2. This statement is already given in the original manuscript. Please see lines at 278-280.

**Section 3.2 and figure 3: The ACT is clearly improved, especially in NorESM2-MM but also in NorESM2-LM and is better (at least from what I can see) than NorESM1-CTL. Thus, part of the improvement is not related to the increased**

atmospheric resolution but to changes in the ingredients of the physical components. Any clue on what they are. Furthermore from January to June, NorESM2 is not that good and worse than NorESM1-CTL. It is significantly warmer and with two maxima close to the African coast and 30-35W. It should be mentioned and ideally commented.

**REPLY:** Thank you very much for this comment. As we replied to the previous comment, we have added an analysis on sea surface height (SSH) seasonal cycle in Fig. R1 (new Fig. S3 in the revised manuscript). Actually, NorESM2-LM/MM have better shoaling in the eastern basin of the equatorial Atlantic during summer. This indicates that NorESM2 has better ocean physics than NorESM1-CTL. In addition, NorESM2-MM has better seasonal cycle in SSH in summer. This statement is given in the revised manuscript. Please see lines at and new Fig.S3.

Regarding the warmer SST in the western basin, we have added some texts on it. Please see lines at .198-199.

**Lines 262-264: what are these improvements? Very vague.**

**REPLY:** Here, we mention the difference in vertical structure of ocean temperature and nitrate concentration and possible causality of the difference.

**Section 3.3: Why using different types of analysis for SST and PP? Is there any reason behind the differential treatment?**

**REPLY:** It has been shown earlier (Chenilatt et al. (2021) and Koseki et al. (2023)) that primary production (Chlorophyll-a) and sea-air CO<sub>2</sub> flux respond sensitively to the inter-annual variability of SST, in particular, Atlantic Niño during summer. Therefore, following their findings, we think it's crucial to first explore how well the NorESM simulations reproduce the Atlantic Niño in terms of its intensity, peak time in summer, and location. This can be assessed in Fig. 6. Following this evaluation, it is important to investigate how the marine biogeochemical processes are influenced by the Atlantic Niño and Niña. Primary production and sea-air CO<sub>2</sub> flux are also determined by other physical and biogeochemical processes that are fluctuated directly and indirectly by the SST anomalies. Therefore, in Figs. 8 and 9, we explore the performance of key marine biogeochemical process fluctuations in response to the Atlantic Niño/Niña. In the case of primary production, upwelling of nitrate is the main drivers, consistent with Chenilatt et al. (2021), while parts of sea-air CO<sub>2</sub> flux response is determined by changes in sea surface salinity (Koseki et al., 2023).

**Why not a Taylor plot for PP (or even better Chlorophyll) similar to what is done with SST.**

**REPLY:** Even though the seasonal cycle of primary production improved following the better SST, it is not necessary that the Taylor plot between two variables becomes quite similar because SST is only one of functions/indicators to determine the primary production.

**Lines 380-382: the ingassing bias between 8S and 10S along Africa is quite strong in NorESM1. What is the cause of that sink. PP does not seem to be very very high at the specific location according to Figure S4. In lines 386-387, it is stated that it might be biogeochemical issues or riverine input. This is really vague and does not say anything.**

**REPLY:** Because NorESM1-AC also reduces the SST bias along the African coast, this ingassing bias in both NorESM1-CTL and NorESM1-AC might stem from marine biogeochemical process associated with the riverine flux, which is one of main differences in biogeochemical processes between NorESM1 and NorESM2. Other possibility could be freshwater input from the Congo River. As Awo et al. (2022) showed, the SSS along the coast is influenced by Congo River plume using a high-resolution regional ocean model. There might be too much of freshwater input from the Congo River. On the other hand, our model has a coarse resolution and it is not adequate to investigate the coastal region. We have added this statement. Please see lines at 413-417.
